# Supplementary material
Source: publisher figshare collection journal article supplement (https://karger.figshare.com/ndownloader/files/17796515)

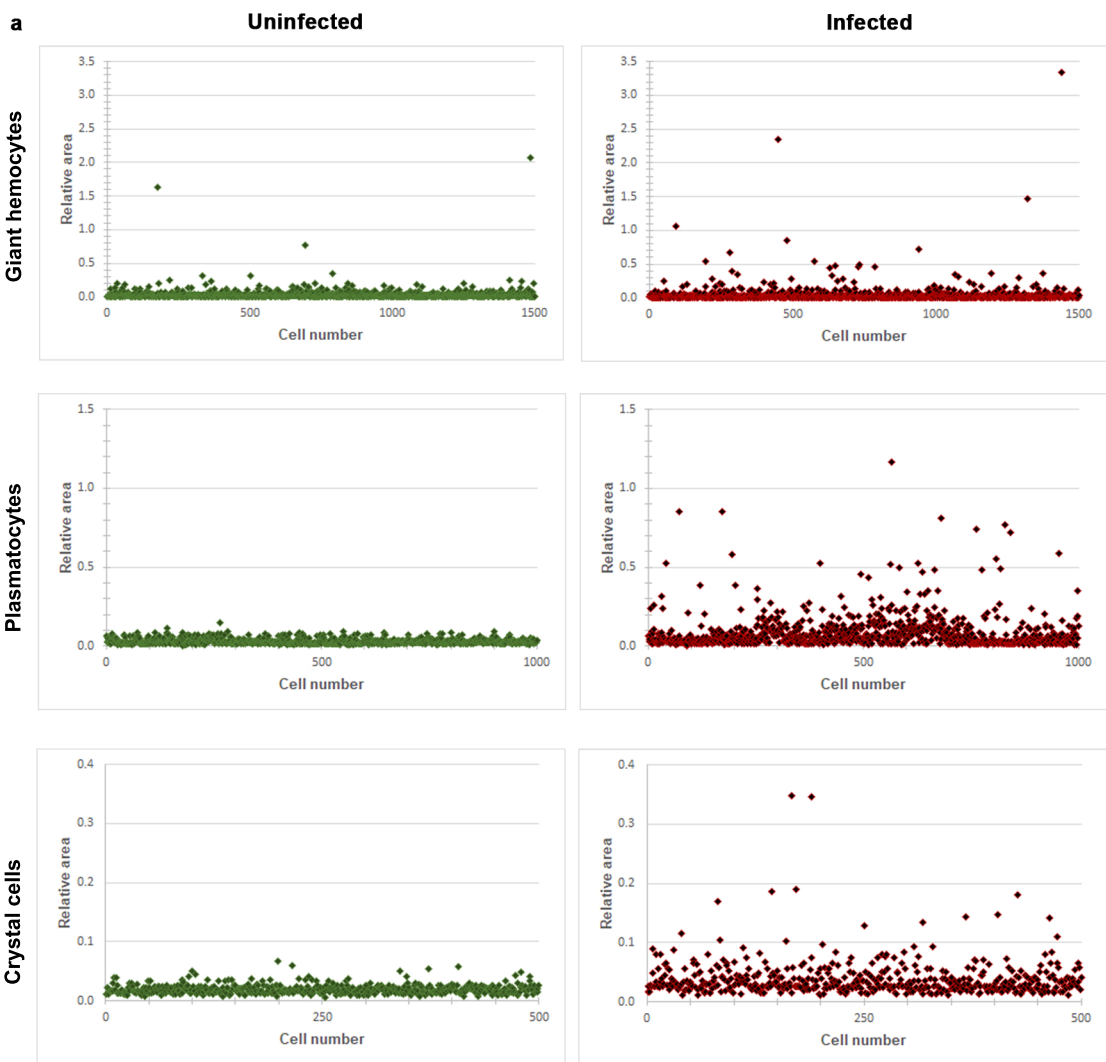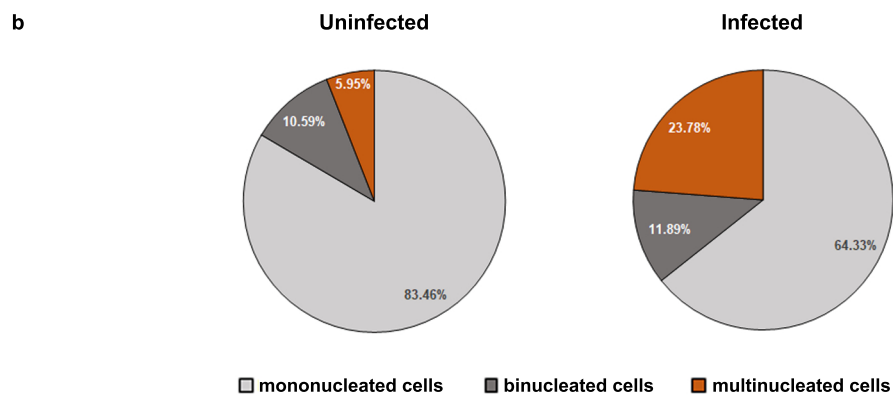

**Figure S2**

Supplement: Supplementary file 1 [file 17796515]
